# Supplementary material
Source: PubMed Central journal article supplement (PMC3551554)

A

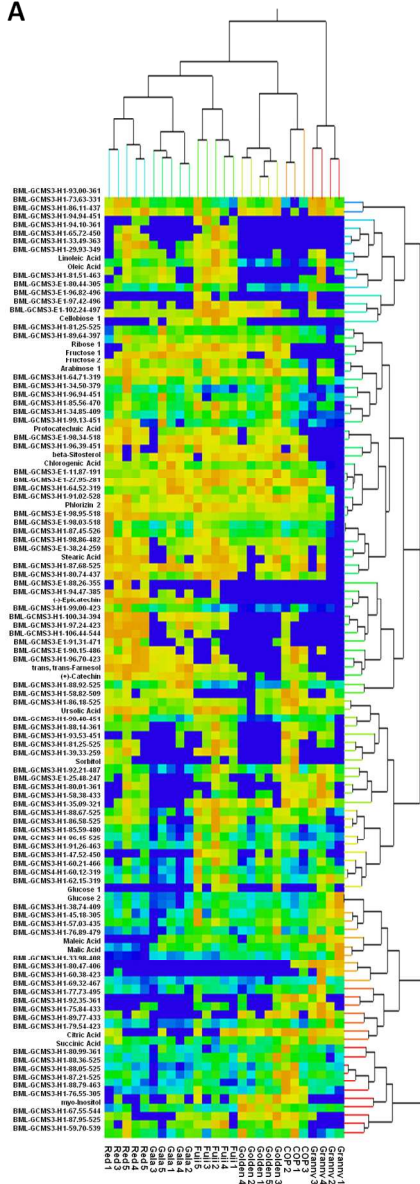

B

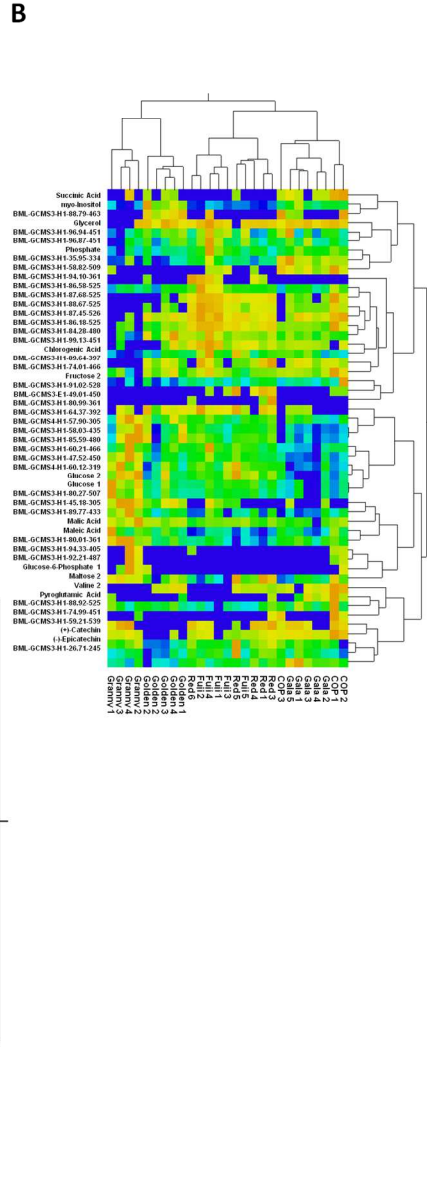

411x556mm (96 x 96 DPI)

Supplement: NIHMS423243-supplement-Supp__info_1.pdf [file NIHMS423243-supplement-Supp__info_1.pdf]
